# Supplementary material
Source: MDPI journal article supplement (https://www.mdpi.com/2297-8739/11/3/68)
Supplement: s1 [file s1]

**Real-time authentication of Camellia oil by rapid evaporative ionization mass  
spectrometry**

**Jun Xiang <sup>1,2</sup>, Qi Liu <sup>1</sup>, Huihua Jing <sup>2</sup> and Xiaoqing Chen <sup>1,\*</sup>**

<sup>1</sup> Chemistry and Chemical Engineering, Central South University, Changsha 410083,  
China; xqchen@csu.edu.cn

<sup>2</sup> Hunan Provincial Institute of Product and Goods Quality Inspection, Changsha  
410007, China; 212302054@csu.edu.cn

\* Correspondence: xqchen@csu.edu.cn

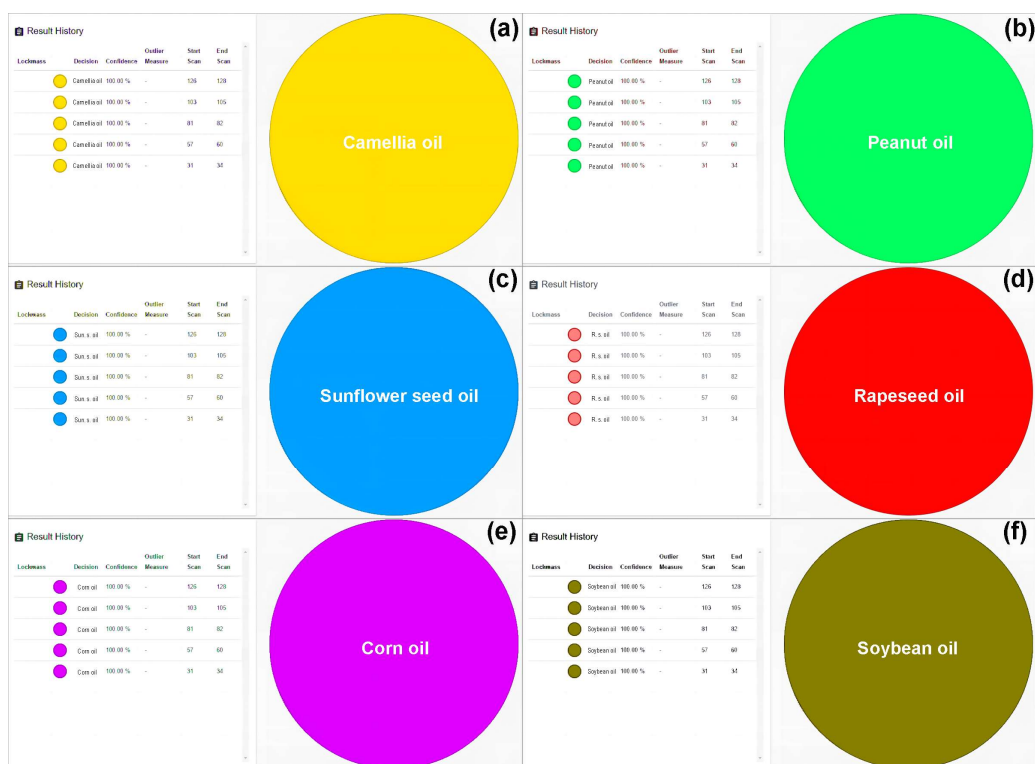

**Figure S1.** Real-time recognition of (a) camellia oil, (b) peanut oil, (c) sunflower seed oil, (d) rapeseed oil, (e) corn oil, and (f) soybean oil using the prototype recognition software.
